# Supplementary material for: SNP/RD Typing of Mycobacterium tuberculosis Beijing Strains Reveals Local and Worldwide Disseminated Clonal Complexes
Source: PubMed Central journal article supplement (PMC3230589; doi:10.1371/journal.pone.0028365), 2011-12-05
Supplement: pone.0028365.s002.pdf [file pone.0028365.s002.pdf]

Supporting Figure S2 Distribution of RD131 in phylogenetic tree  
 Strains with background colors were assayed for the absence or presence of the RD.  
 No background color: strain not assayed.  
 Red: RD is present (deletion was identified).  
 Yellow: RD is absent (no deletion has occurred).

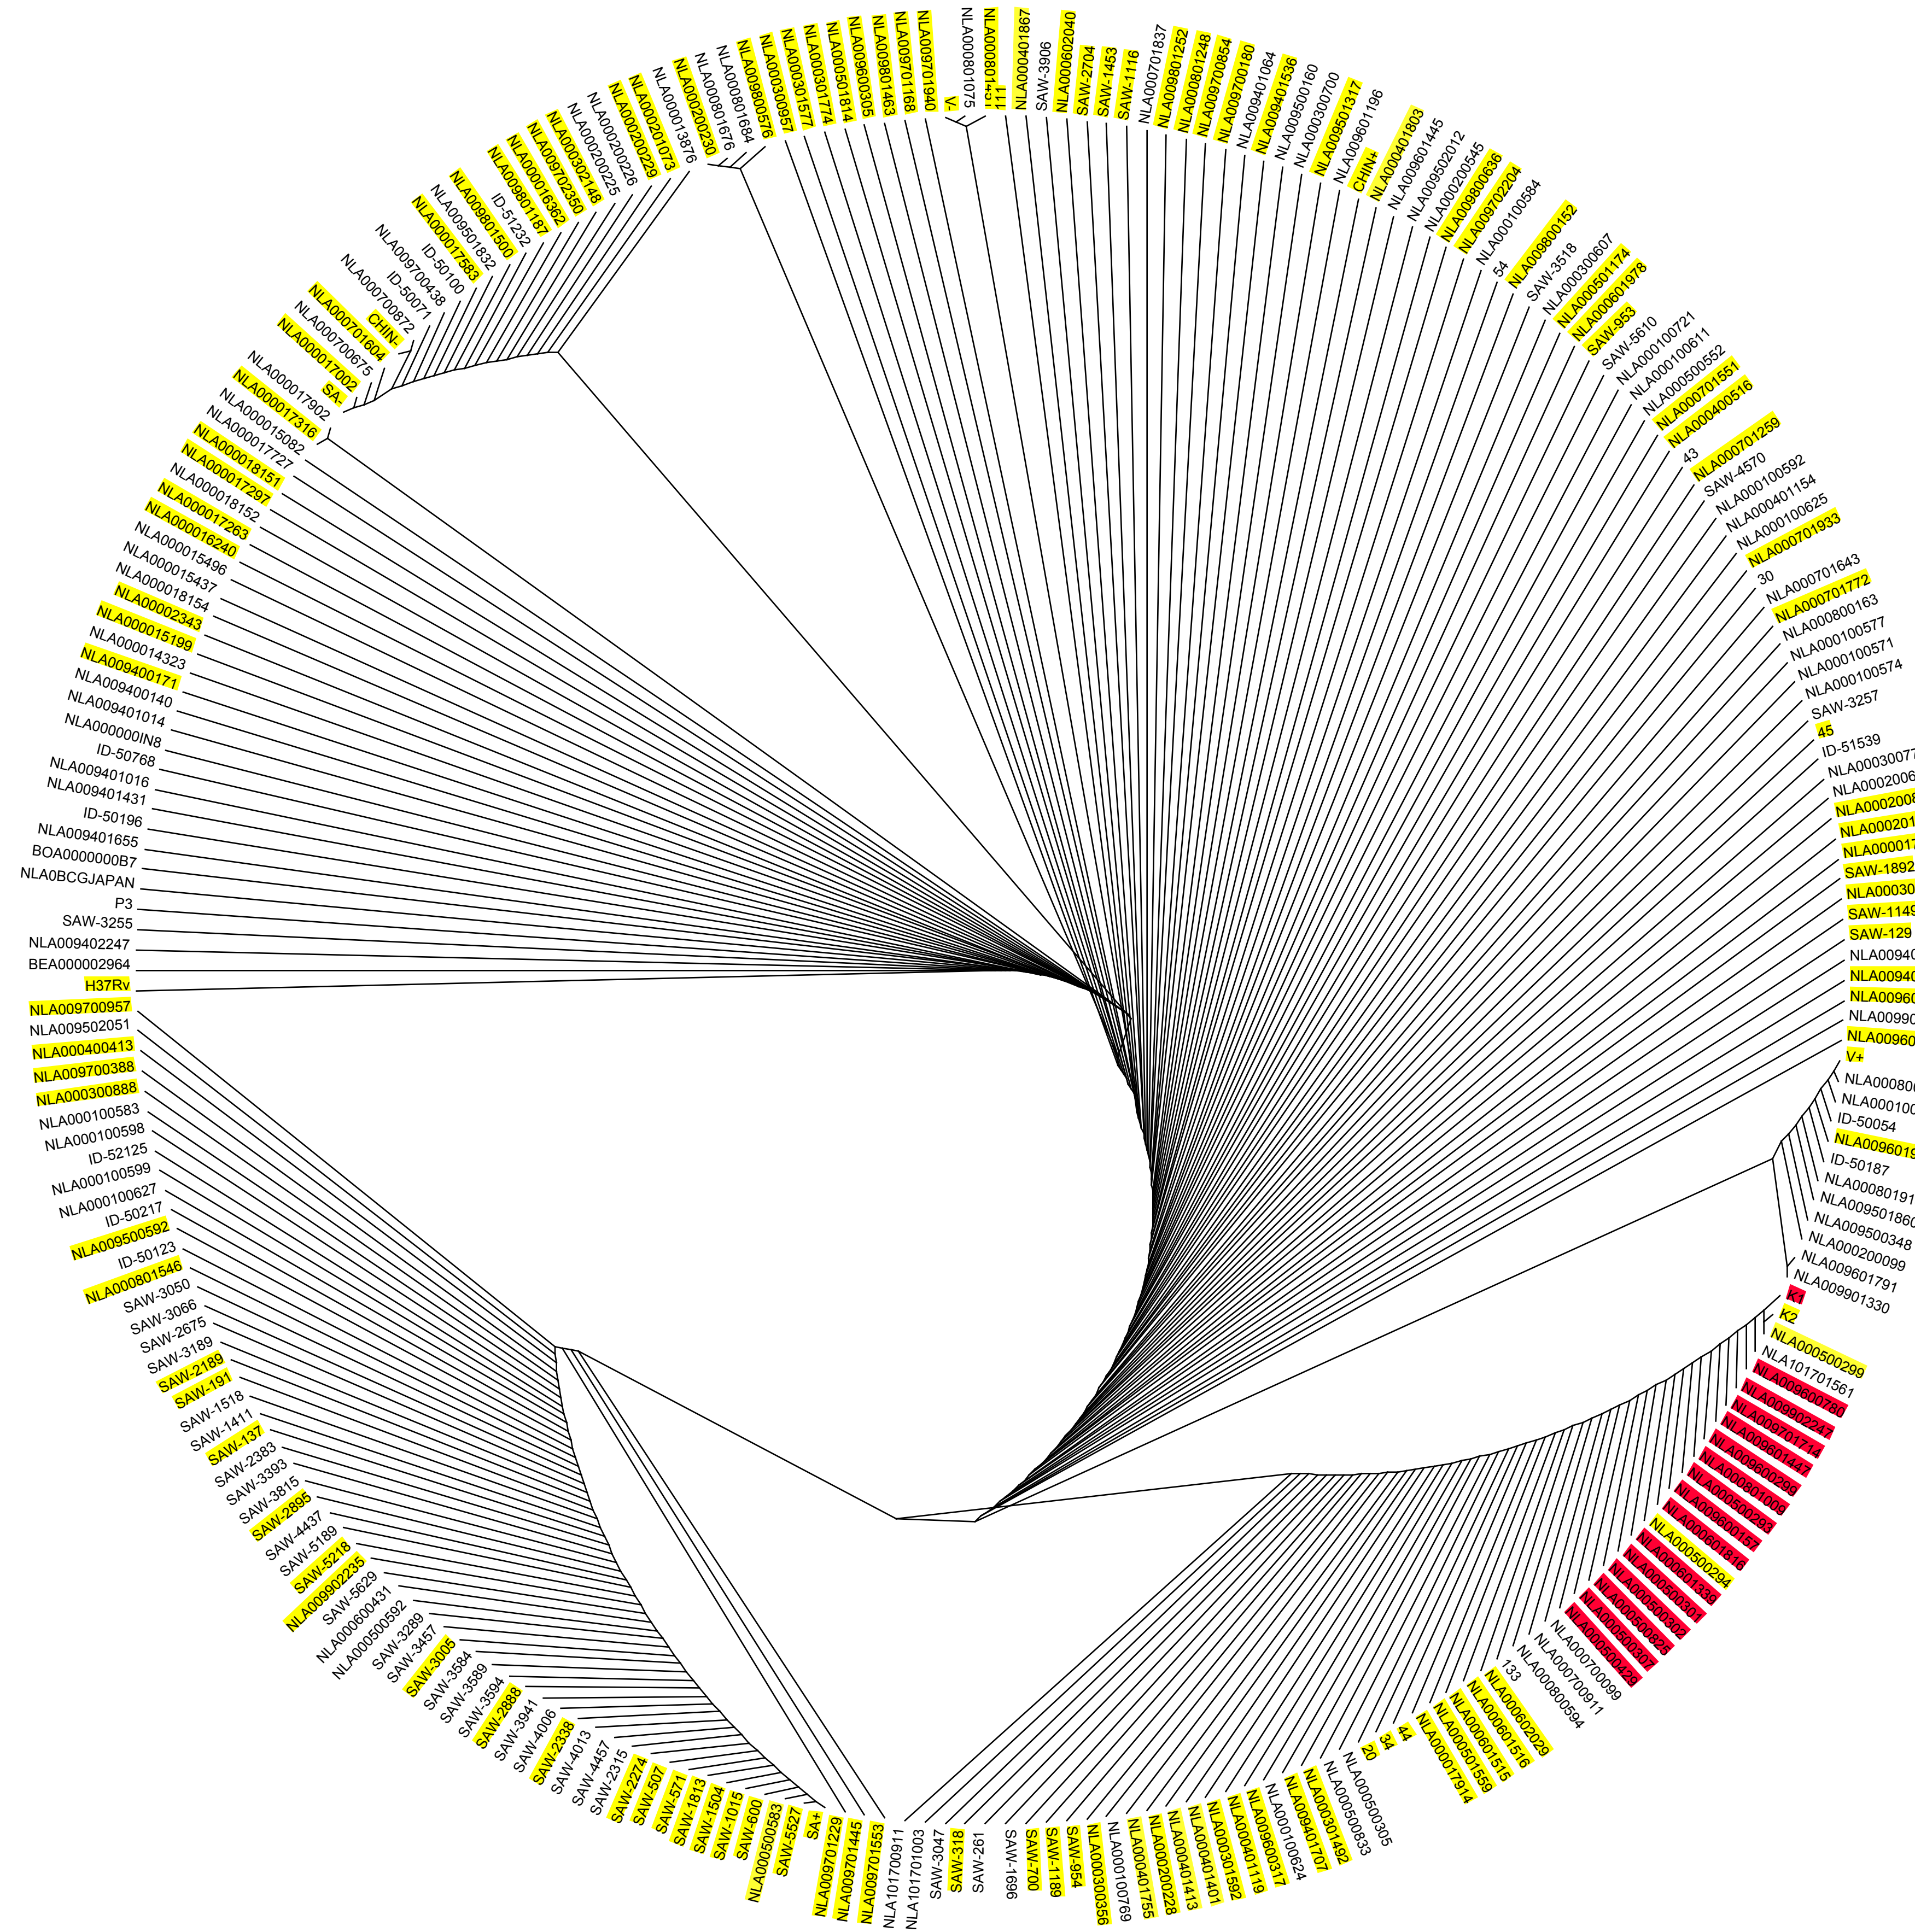

I do not think that it has been shown that mutT genes are really inactivated in Beijings, but there are other options as well.
