# Supplementary material for: SNP/RD Typing of Mycobacterium tuberculosis Beijing Strains Reveals Local and Worldwide Disseminated Clonal Complexes
Source: PubMed Central journal article supplement (PMC3230589; doi:10.1371/journal.pone.0028365), 2011-12-05

Supplementary Figure 4. **Distribution of RD197 in the phylogenetic tree**  
Strains with background colors were assayed for the absence or presence of the RD.  
No background color: strain not assayed.  
Red: RD is present (deletion was identified).  
Yellow: RD is absent (no deletion has occurred).

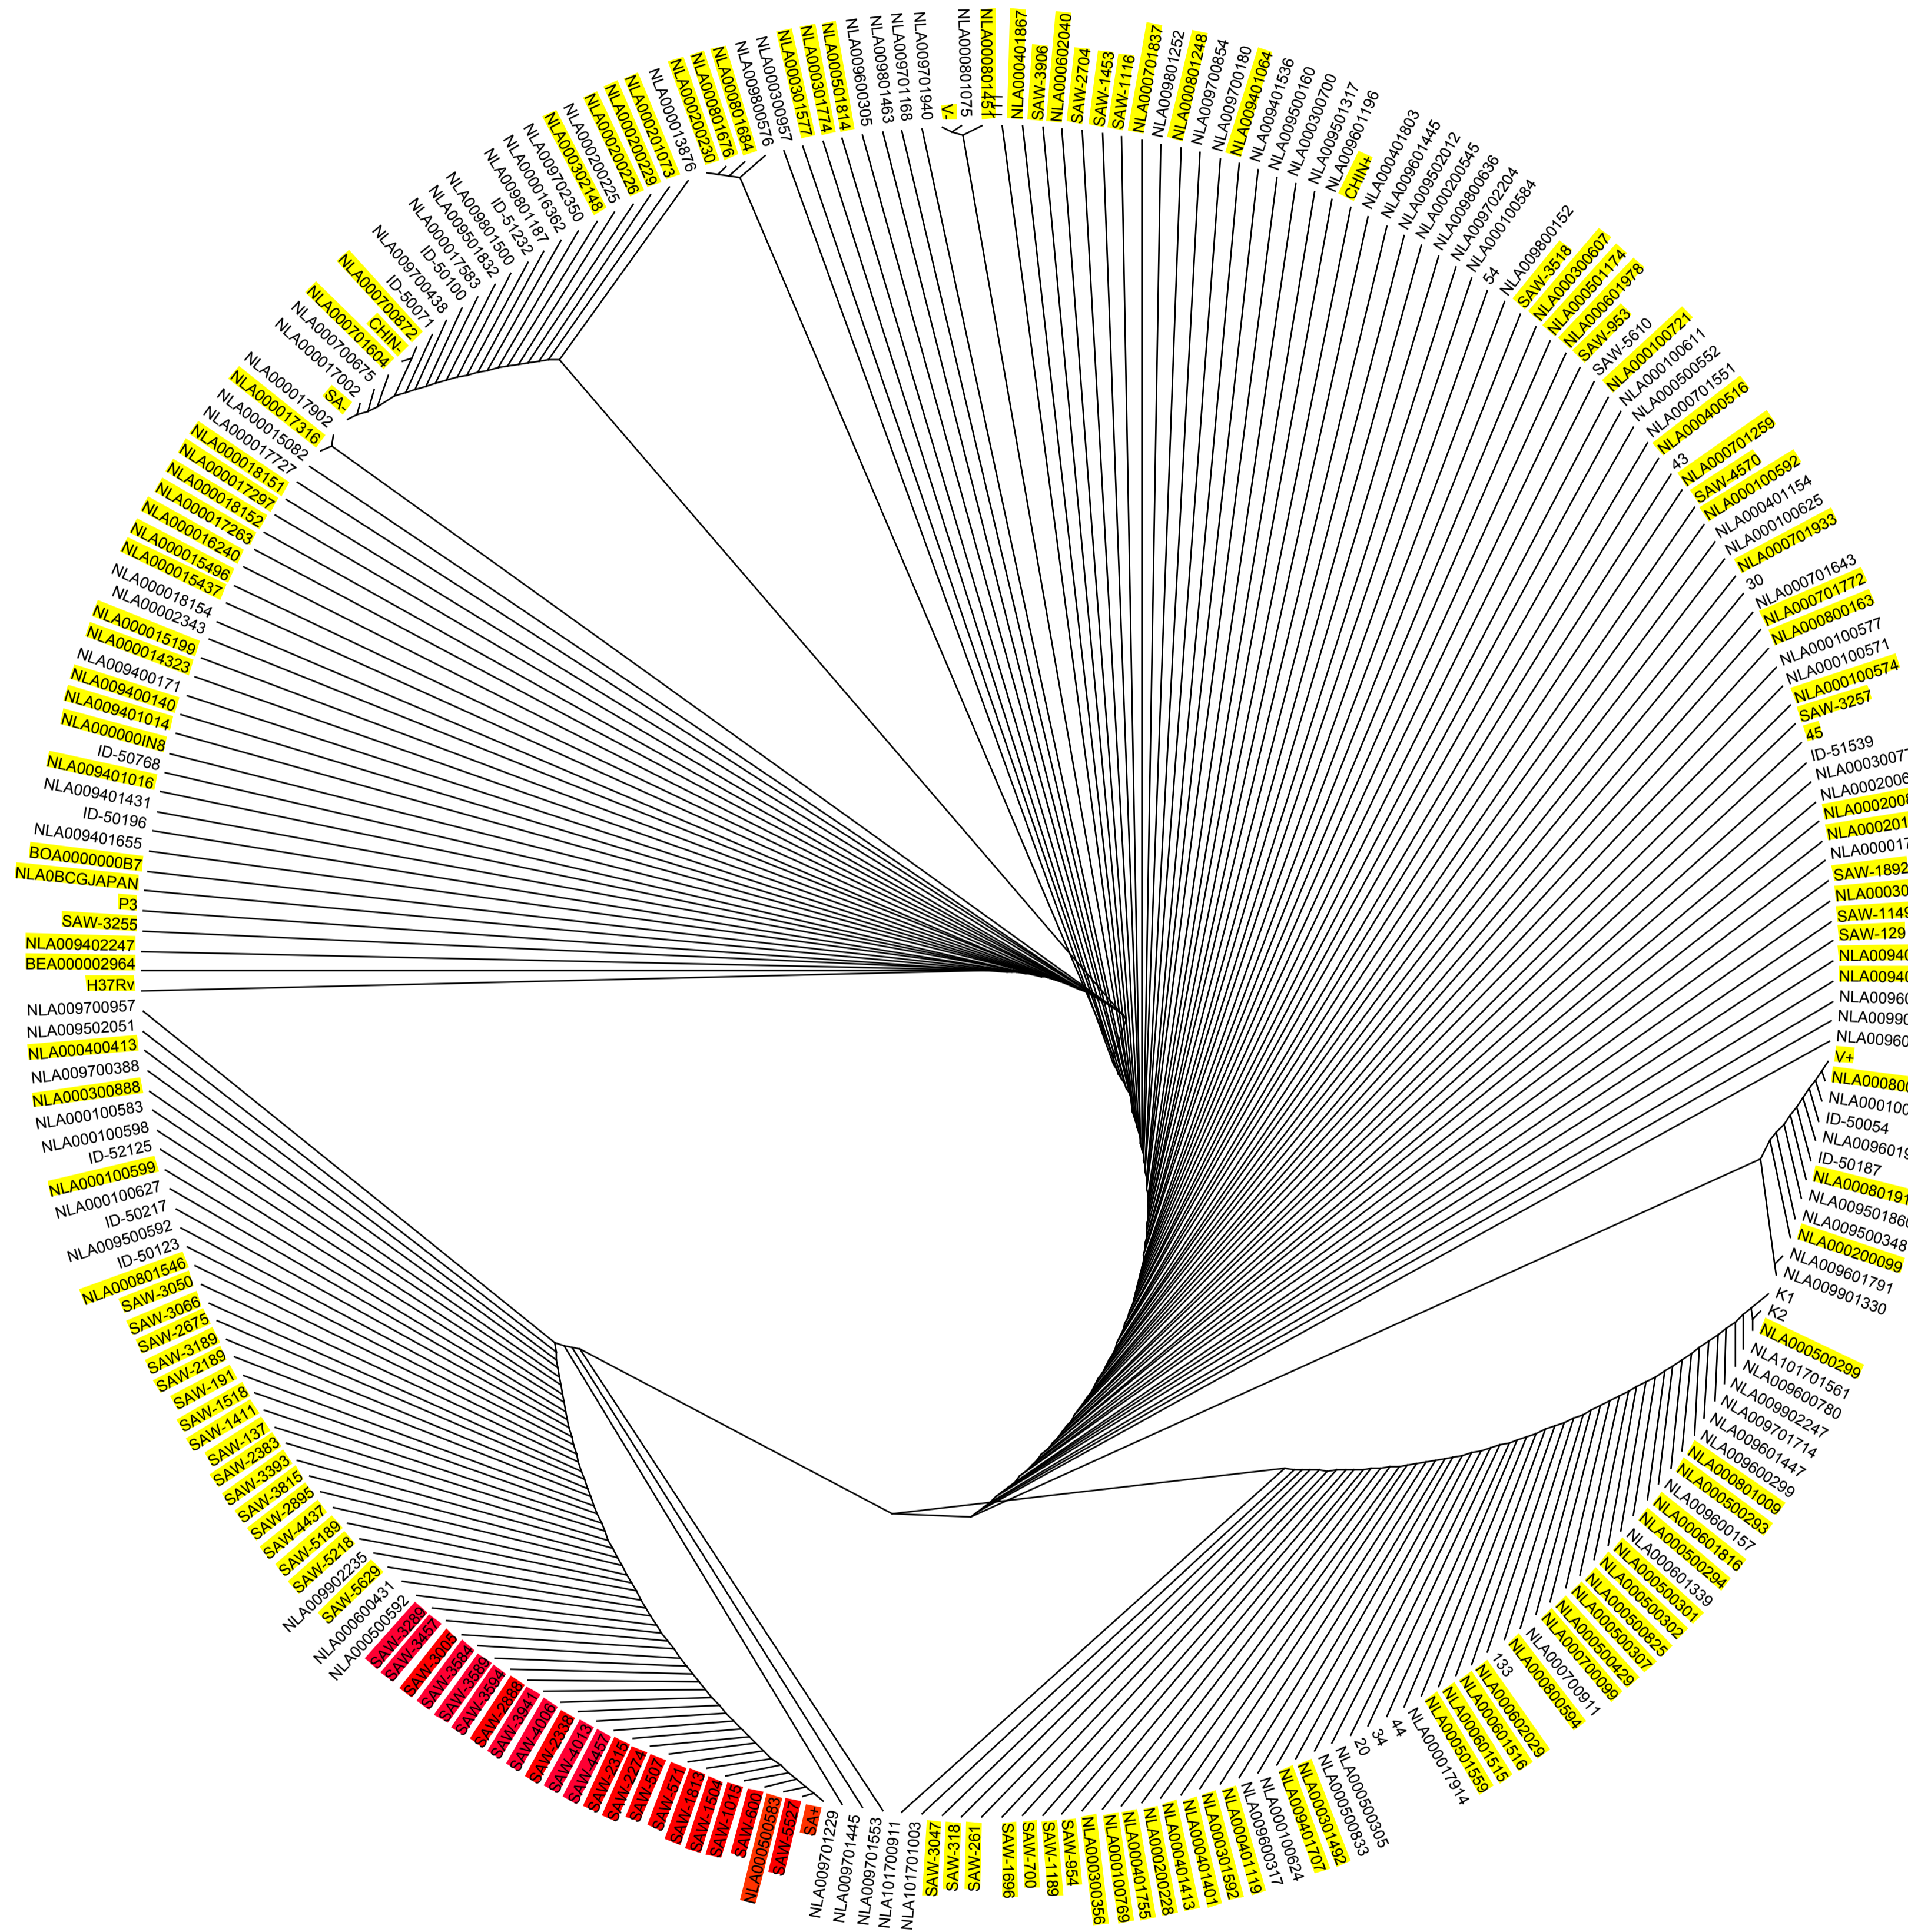

Supplement: pone.0028365.s004.pdf [file pone.0028365.s004.pdf]
