# Supplementary material for: SNP/RD Typing of Mycobacterium tuberculosis Beijing Strains Reveals Local and Worldwide Disseminated Clonal Complexes
Source: PubMed Central journal article supplement (PMC3230589; doi:10.1371/journal.pone.0028365), 2011-12-05

Supporting Figure S5, **Distribution of RD185 in the phylogenetic tree**  
 Strains with background colors were assayed for the absence or presence of the RD.  
 No background color: strain not assayed.  
 Red: RD is present (deletion was identified).  
 Yellow: RD is absent (no deletion has occurred).  
 Green: product of other size than expected product

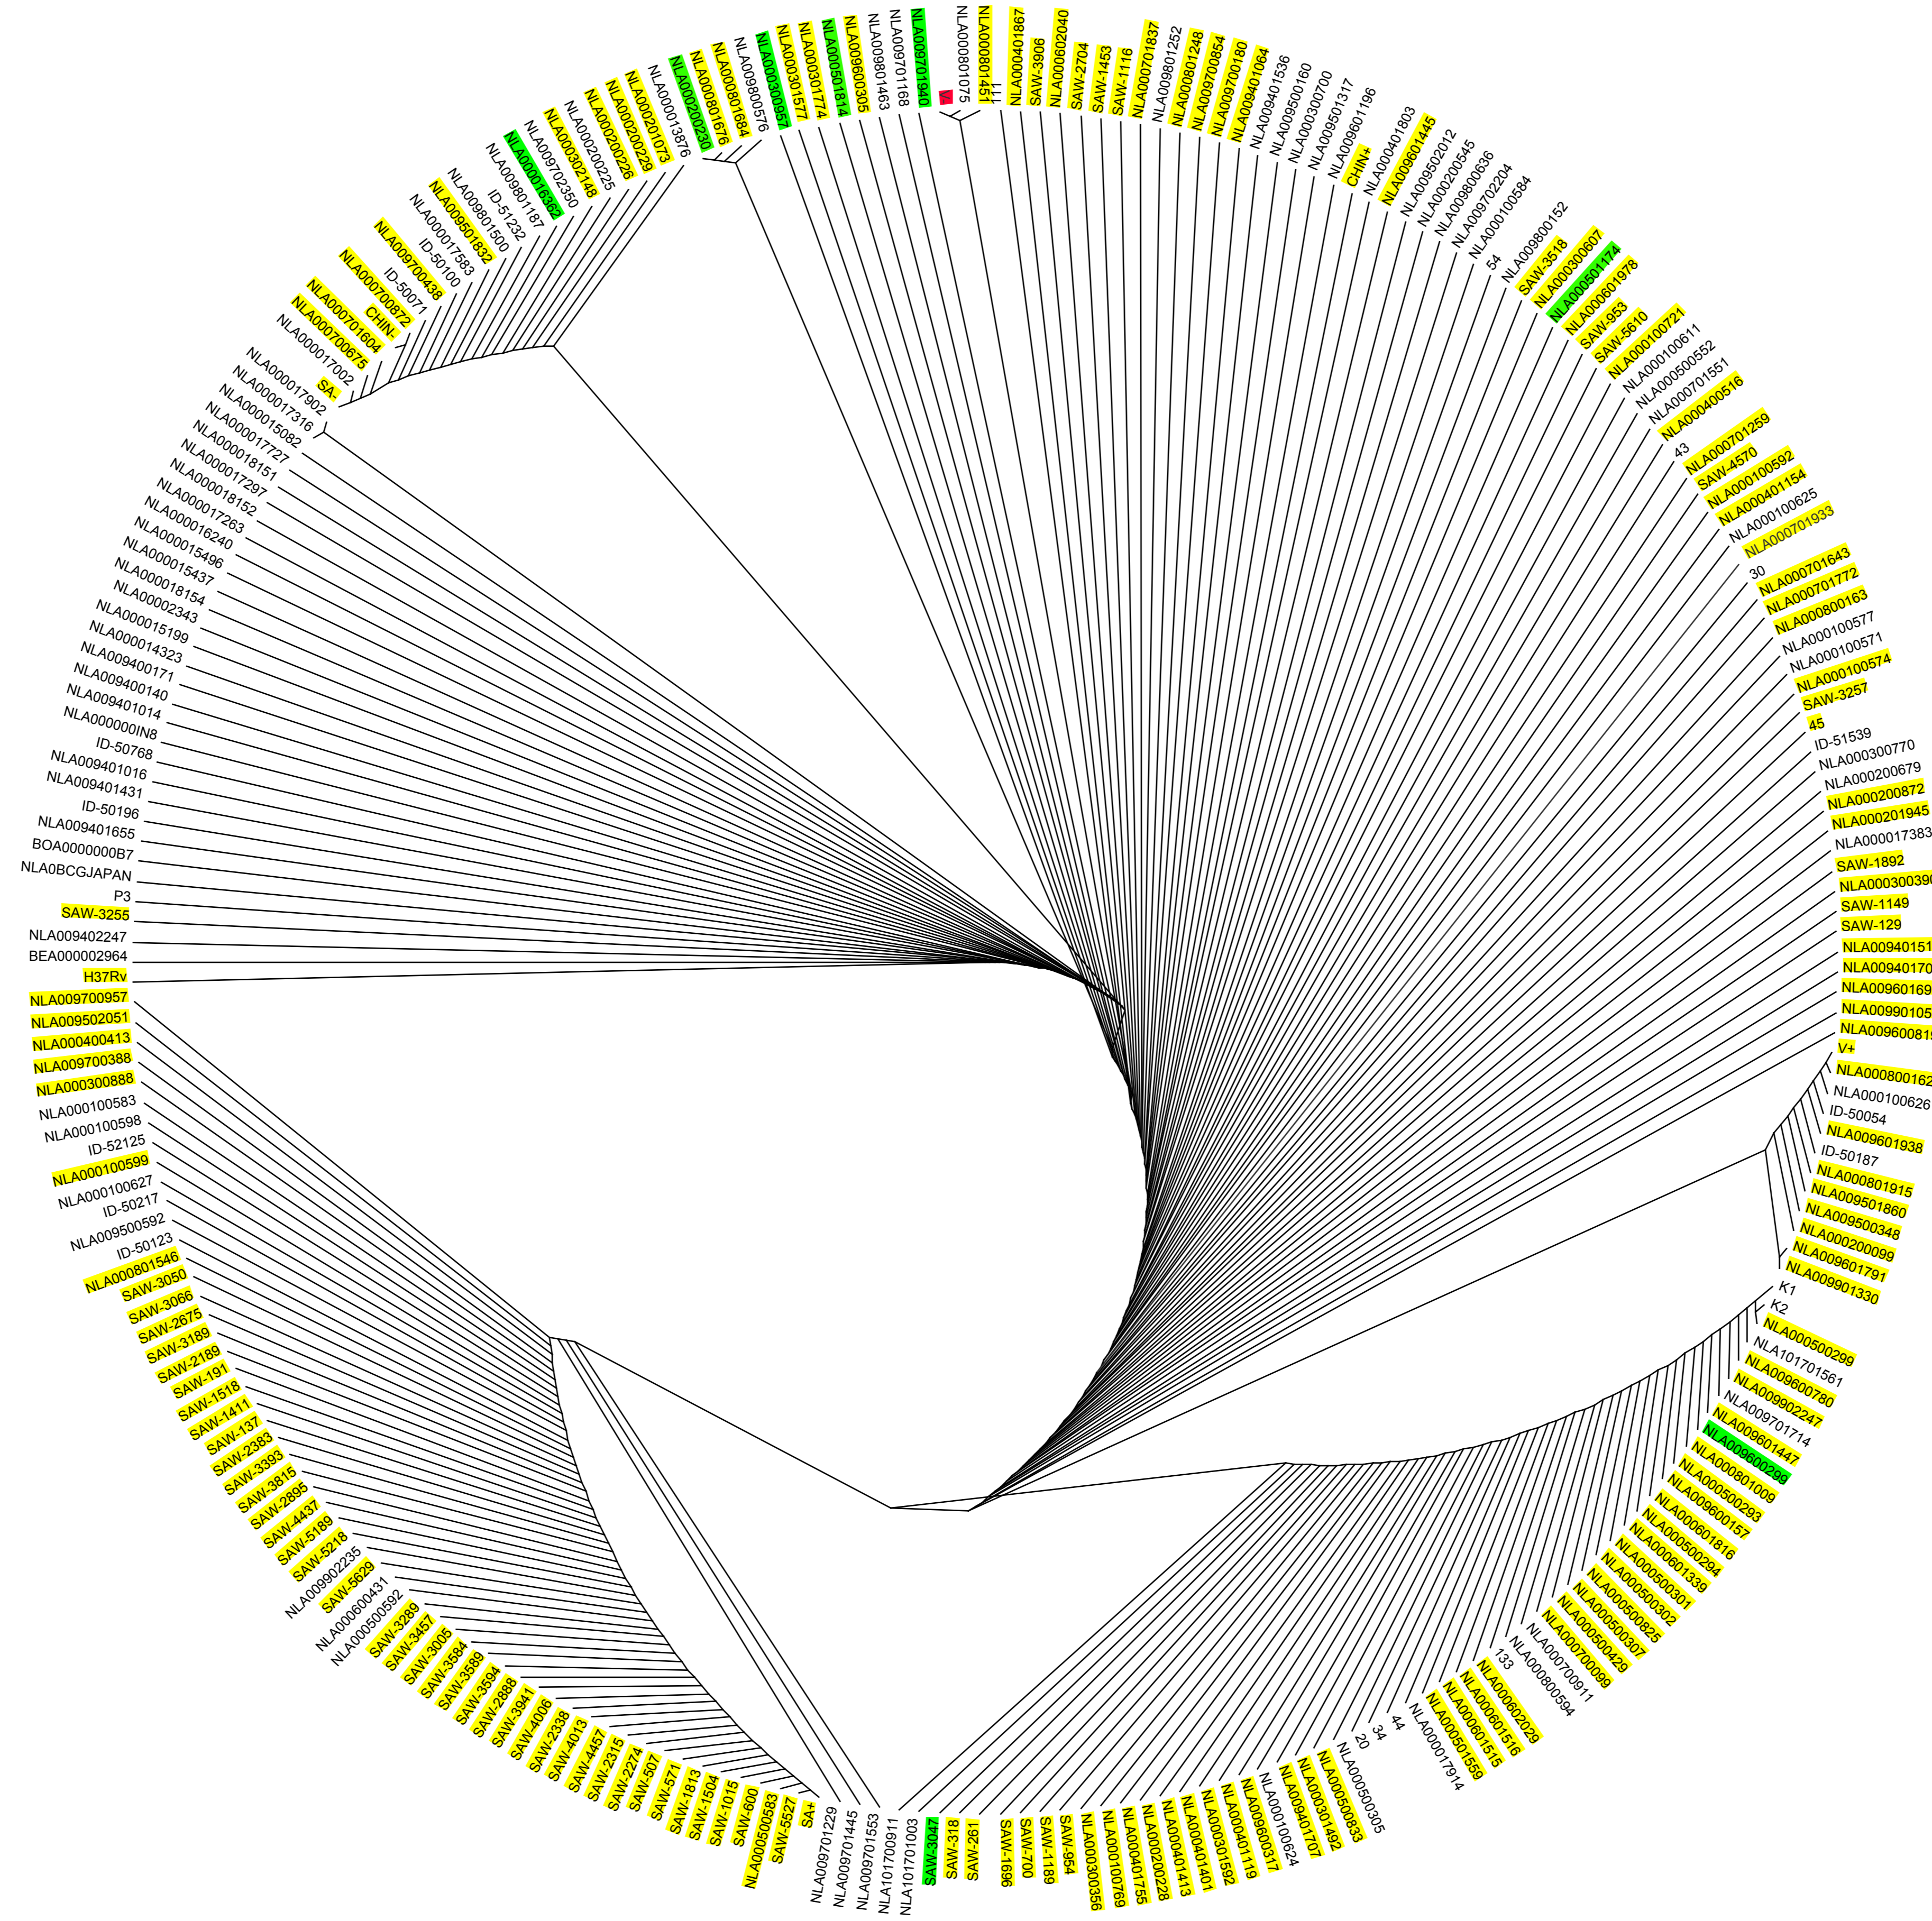

Supplement: pone.0028365.s005.pdf [file pone.0028365.s005.pdf]
