# Supplementary material for: SNP/RD Typing of Mycobacterium tuberculosis Beijing Strains Reveals Local and Worldwide Disseminated Clonal Complexes
Source: PubMed Central journal article supplement (PMC3230589; doi:10.1371/journal.pone.0028365), 2011-12-05

Figure S8: Scheme of workflow applied in this study

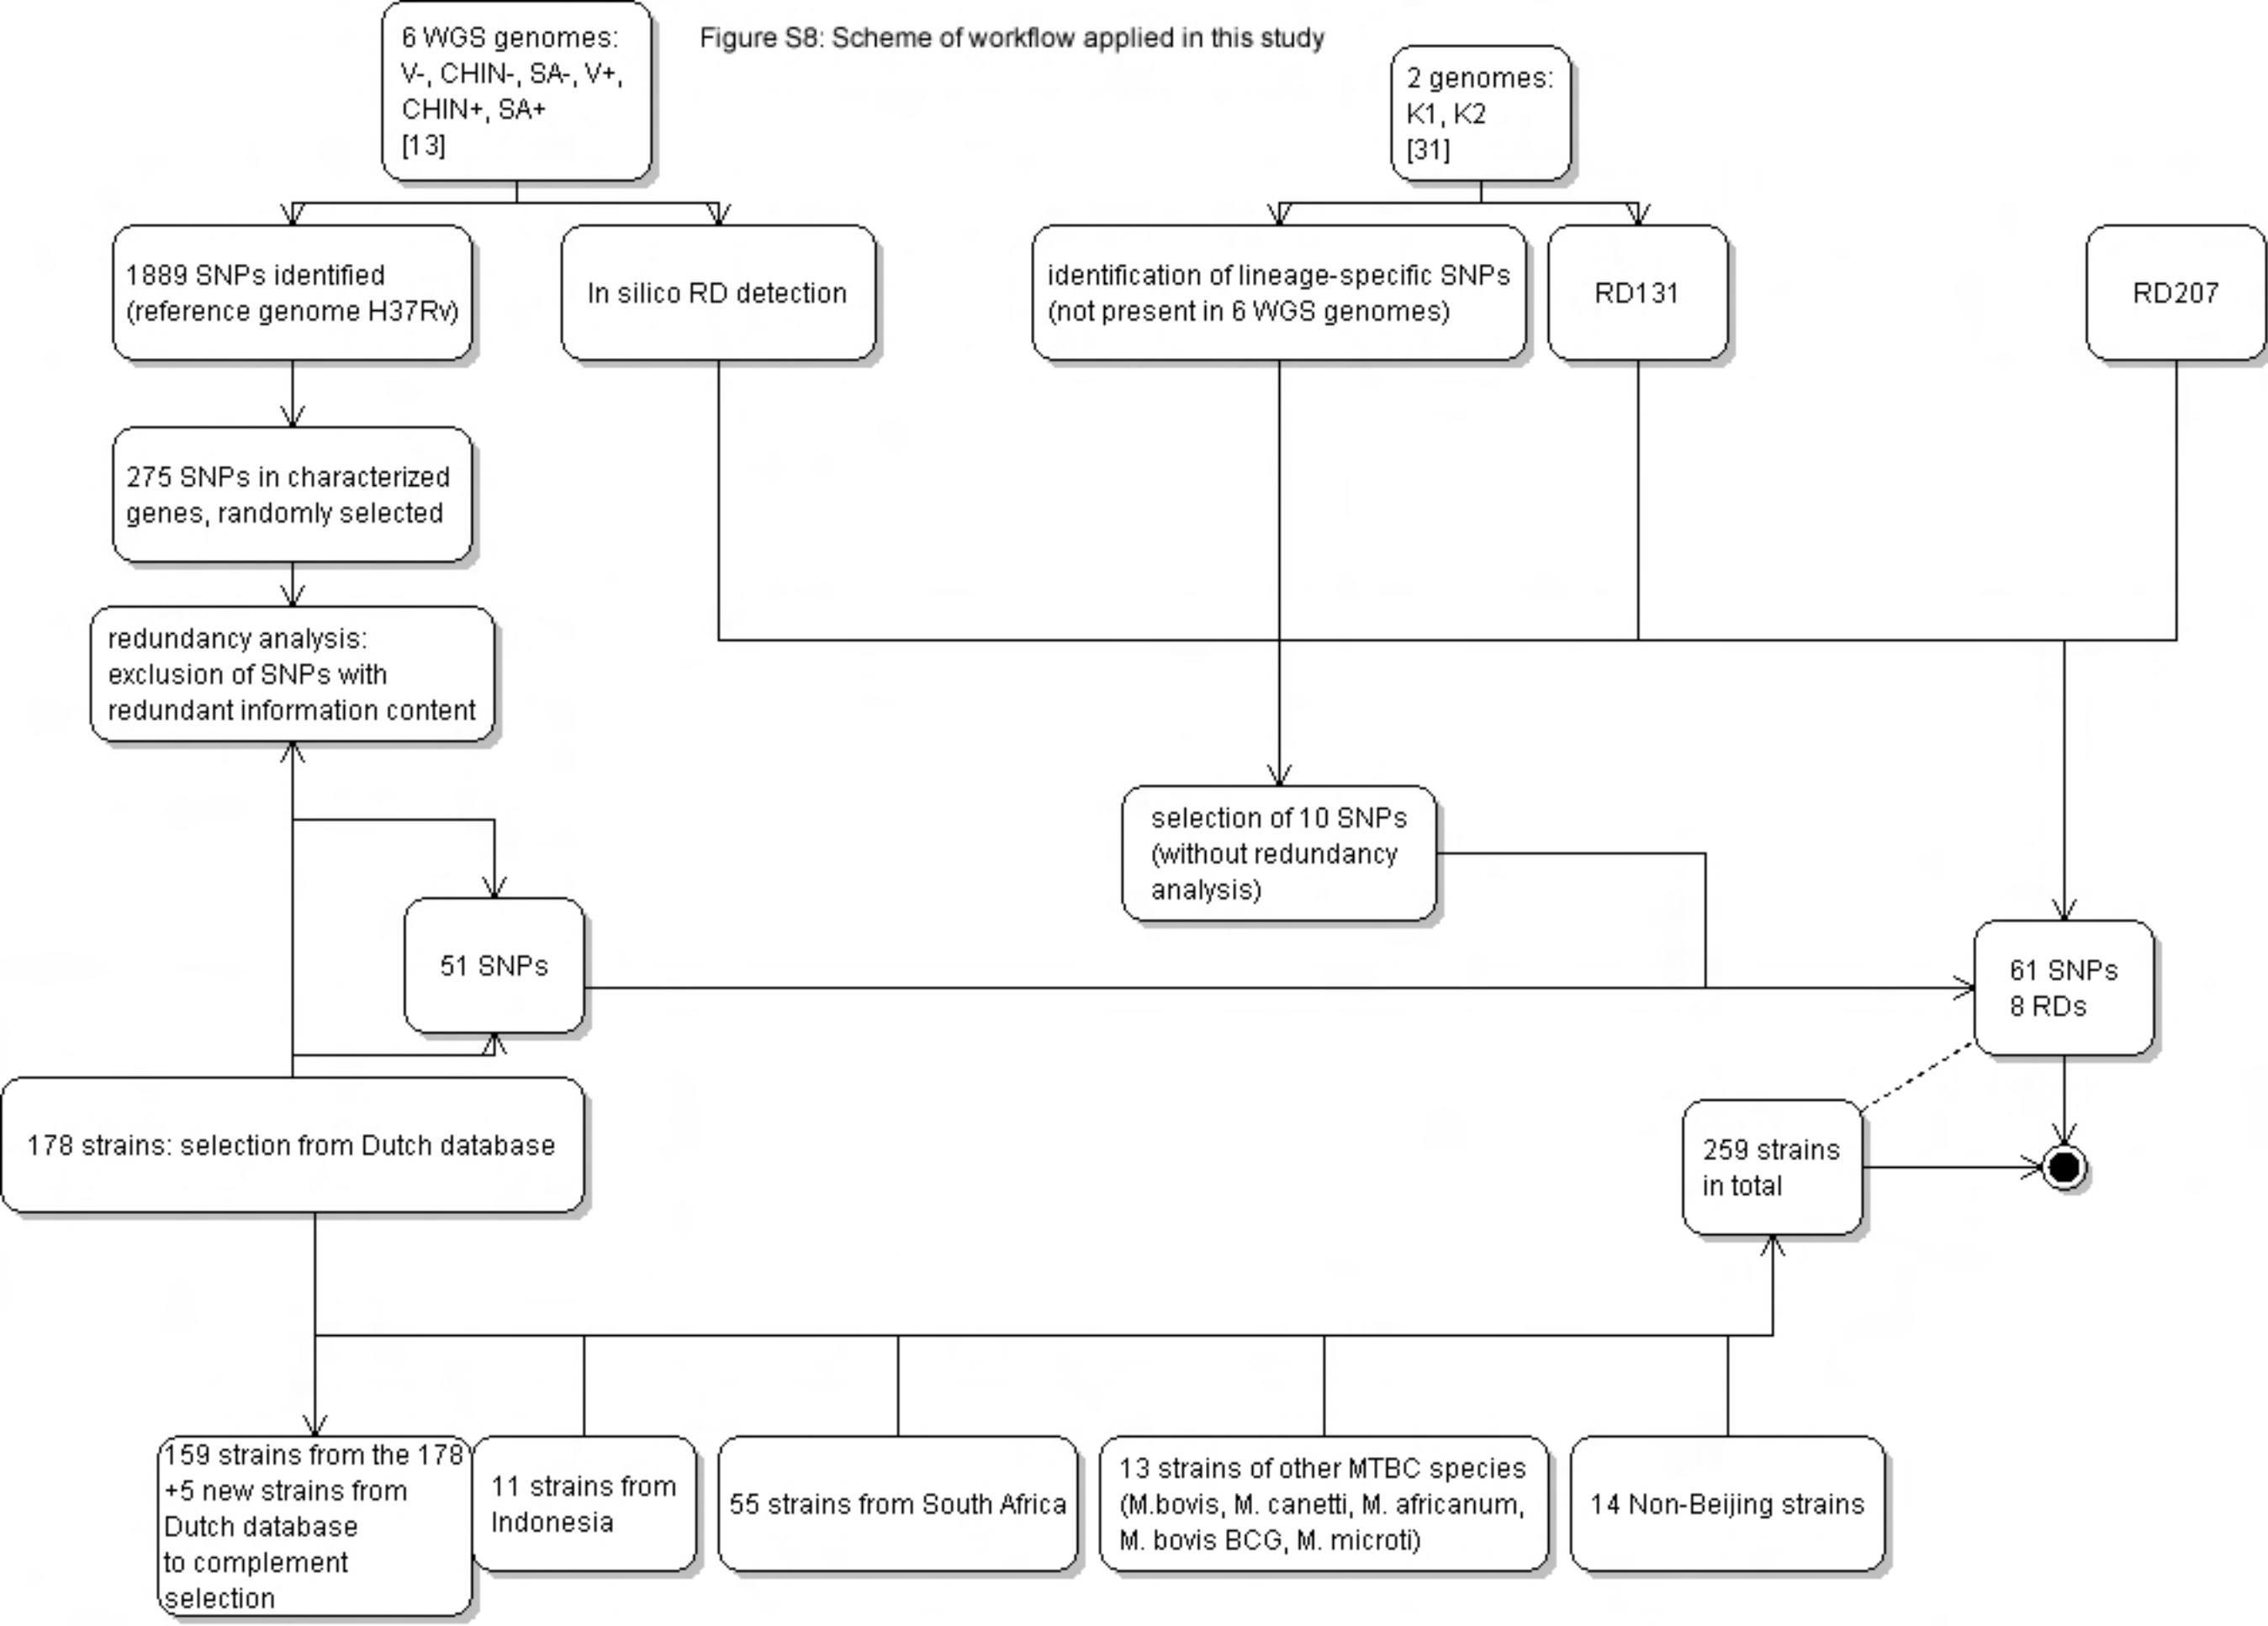

Supplement: pone.0028365.s008.pdf [file pone.0028365.s008.pdf]
